# Supplementary material for: Piezoelectricity in excess of 30 pC N−1 with a high Curie temperature of 950 °C in strongly textured CaBi2Nb2O9 ceramics
Source: Royal Society of Chemistry journal article supplement (doi:10.1039/d4ta07448c), 2024-12-11
Supplement: d4ta07448c1.pdf [file d4ta07448c1.pdf]

## Supporting Information

### **Piezoelectricity in Excess of 30 pC/N with a High Curie Temperature of 950 °C in the Strong Textured CaBi<sub>2</sub>Nb<sub>2</sub>O<sub>9</sub> Ceramics**

*Xiaogang Luo*<sup>a, b</sup>, *Mengsi Wang*<sup>a</sup>, *Xi Yuan*<sup>b</sup>, *Yan Zhang*<sup>a</sup>, *Xuefan Zhou*<sup>a, \*</sup>, *Hang Luo*<sup>a, \*</sup>, *Dou Zhang*<sup>a</sup>

<sup>a</sup> *State Key Laboratory of Powder Metallurgy, Central South University, Changsha 410083, China.*

<sup>b</sup> *College of Chemistry and Chemical Engineering, Central South University, Changsha, Hunan 410083, China.*

\* Corresponding authors

Xuefan Zhou: [zhouxuefan@csu.edu.cn](mailto:zhouxuefan@csu.edu.cn)

Hang

Luo:

[Hangluo@csu.edu.cn](mailto:Hangluo@csu.edu.cn)

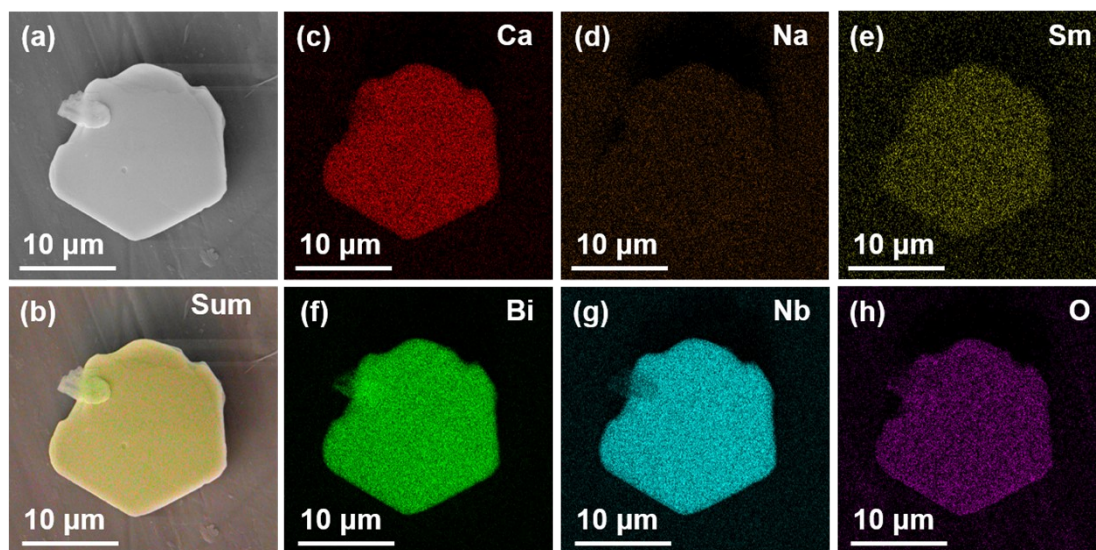

**S1** (a-h) The SEM-EDS element mappings of CBNNS-0.025 templates.

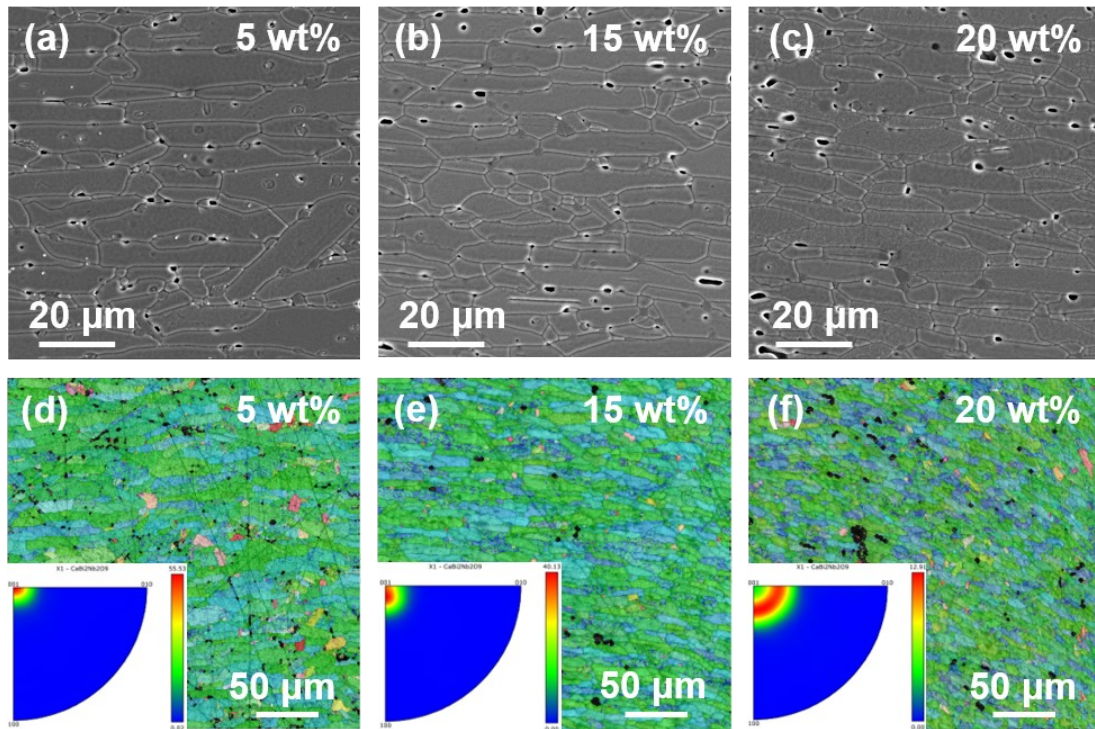

**S2** (a-c) The SEM images of T5, T15, and T20 ceramics. (d-f) The EBSD images of T5, T15, and T20 ceramics (the insets in the left bottom of EBSD images are their inverse pole figures, respectively).

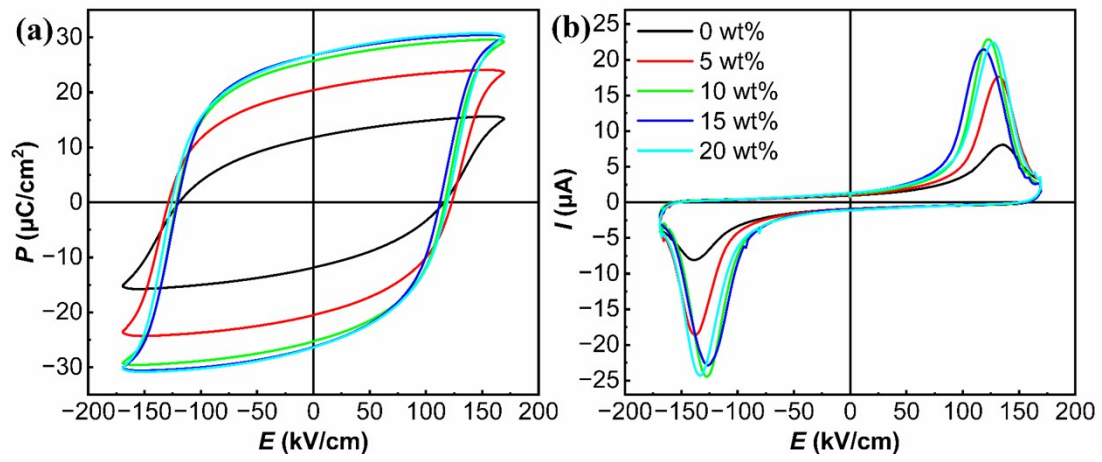

S3 (a)  $P$ - $E$  and (b)  $I$ - $E$  hysteresis loops of T0-T20 ceramics.

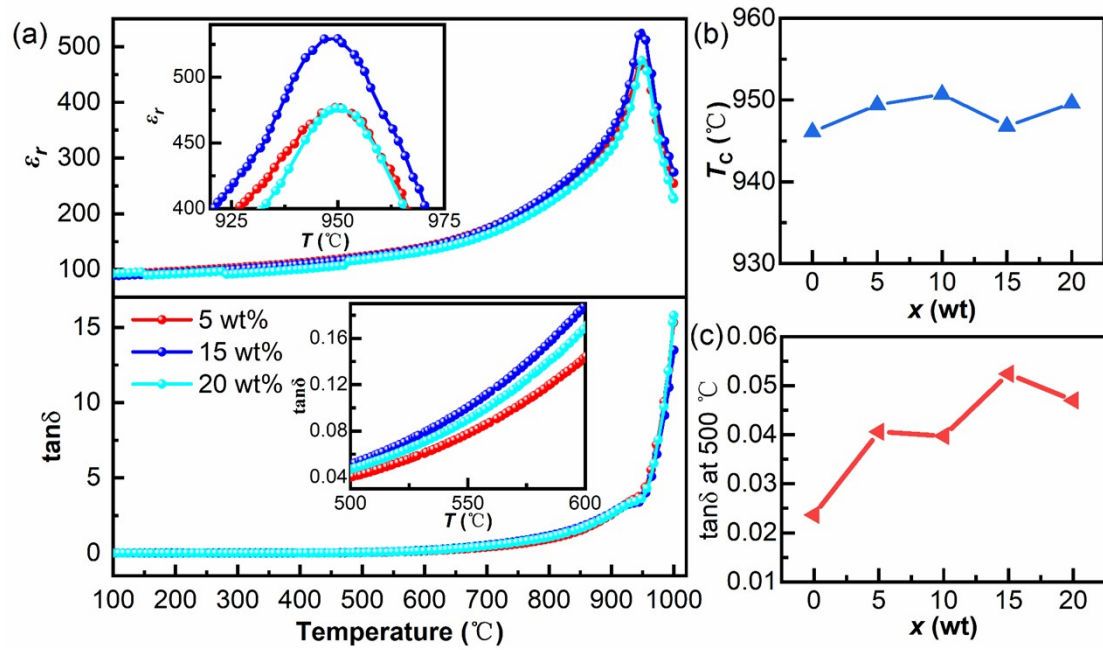

**S4** (a) Variation of  $\epsilon_r$  and  $\tan\delta$  as a function of temperature for the T5, T15, and T20 ceramics (Insets show the locally enlarged view of the  $\epsilon_r$ - $T$  and  $\tan\delta$ - $T$  curves). (b)  $T_c$  as a function of template content for the T0-T20 ceramics. (c)  $\tan\delta$  at 500  $^{\circ}\text{C}$  as a function of template content for the T0-T20 ceramics.

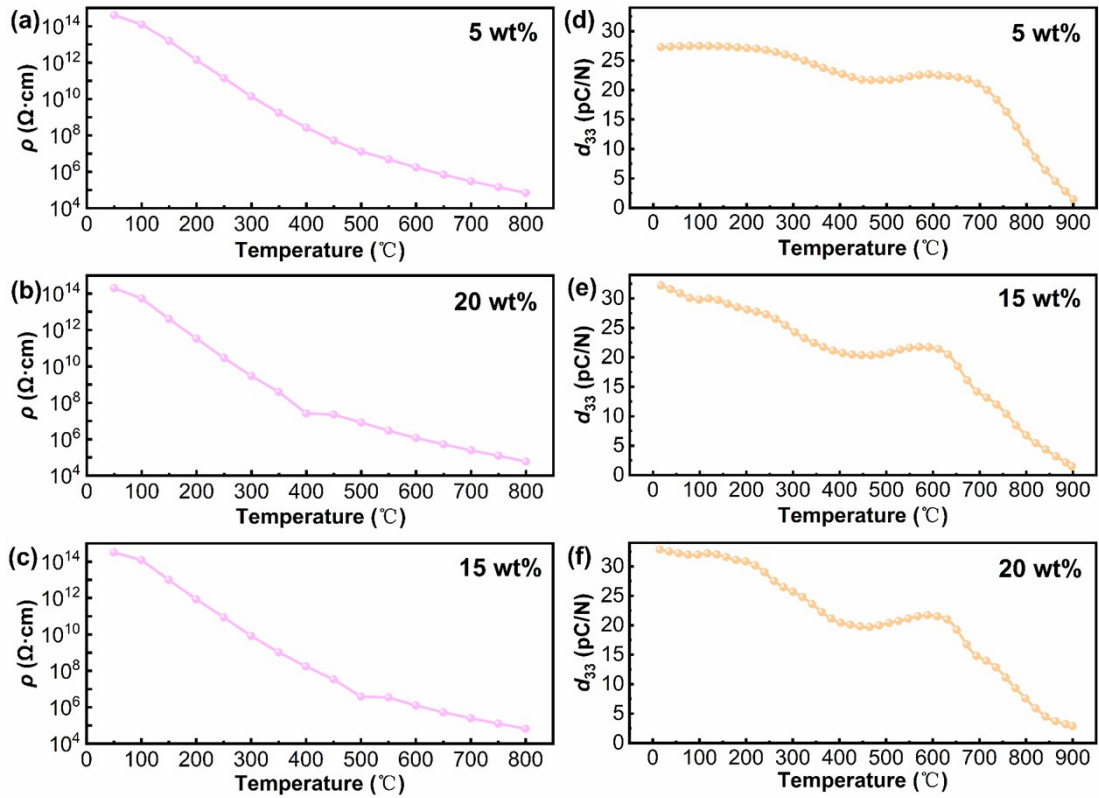

**S5** (a-c) The variation of DC resistivity  $\rho$  with temperature for T5, T15, and T20 ceramics. (d-e) The variation of in situ  $d_{33}$  of T5, T15, and T20 ceramics as a function of temperature.

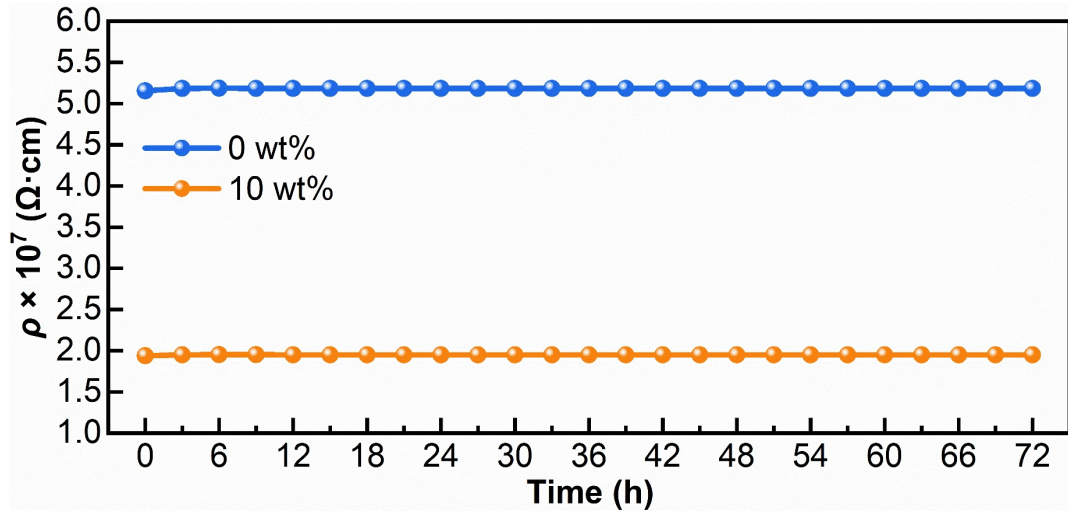

S6 The variation of DC resistivity  $\rho$  at 500 °C with temperature for T0 and T10 ceramics.
